# Supplementary material for: Variation in photosynthetic induction between rice accessions and its potential for improving productivity
Source: PubMed Central journal article supplement (PMC7383871; doi:10.1111/nph.16454), 2020-03-03
Supplement: NPH-227-1097-s001.pdf [file NPH-227-1097-s001.pdf]

1 New Phytologist Supporting Information Figs S1–S4 and Tables S1 & S2  
2 Article title: Variation in photosynthetic induction between rice accessions and its potential for improving  
3 productivity  
4  
5 Authors: Liana G. Acevedo-Siaca, Robert Coe, Yu Wang, Johannes Kromdijk, W. Paul Quick and  
6 Stephen P. Long. Article acceptance date: 13 January 2020.

7

8 **SUPPLEMENTARY FIGURES AND TABLES:**

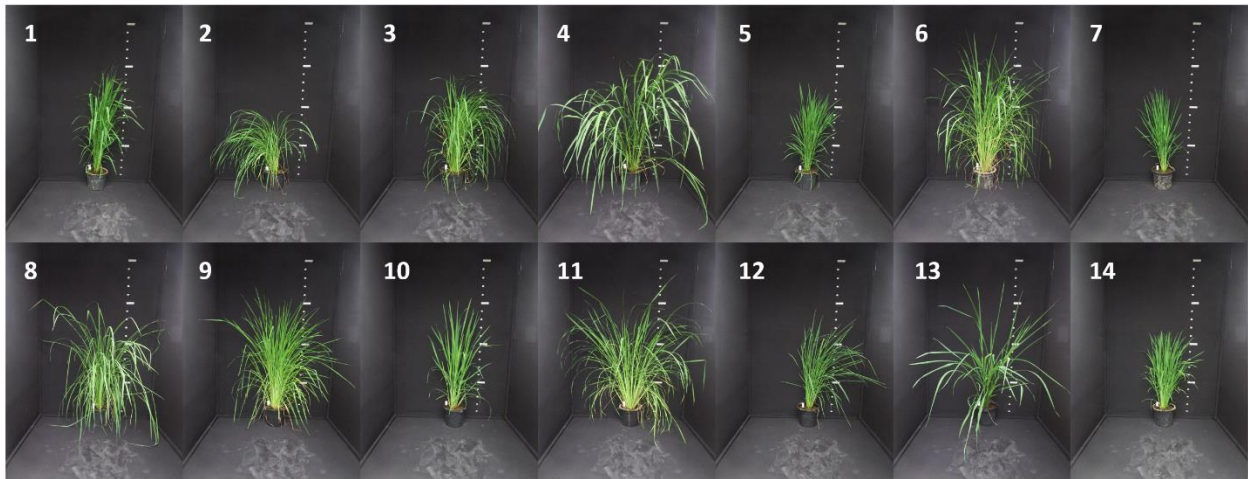

9

10 **Fig. S1** Selected rice (*Oryza sativa*) accessions are as follow: 1 – ARC 11768, 2 – ARC 13502, 3 – ARC  
11 14663, 4 – AUS 278, 5 – Dechangbyeo, 6 – Du Gen Chuan, 7 – Fei Zhao 12, 8 – JC1, 9 – K2 C45, 10 –  
12 Malagkit, 11 – NCS 771A, 12 – M 102, 13 – Malogbana, 14 – IR64-21.

13

14

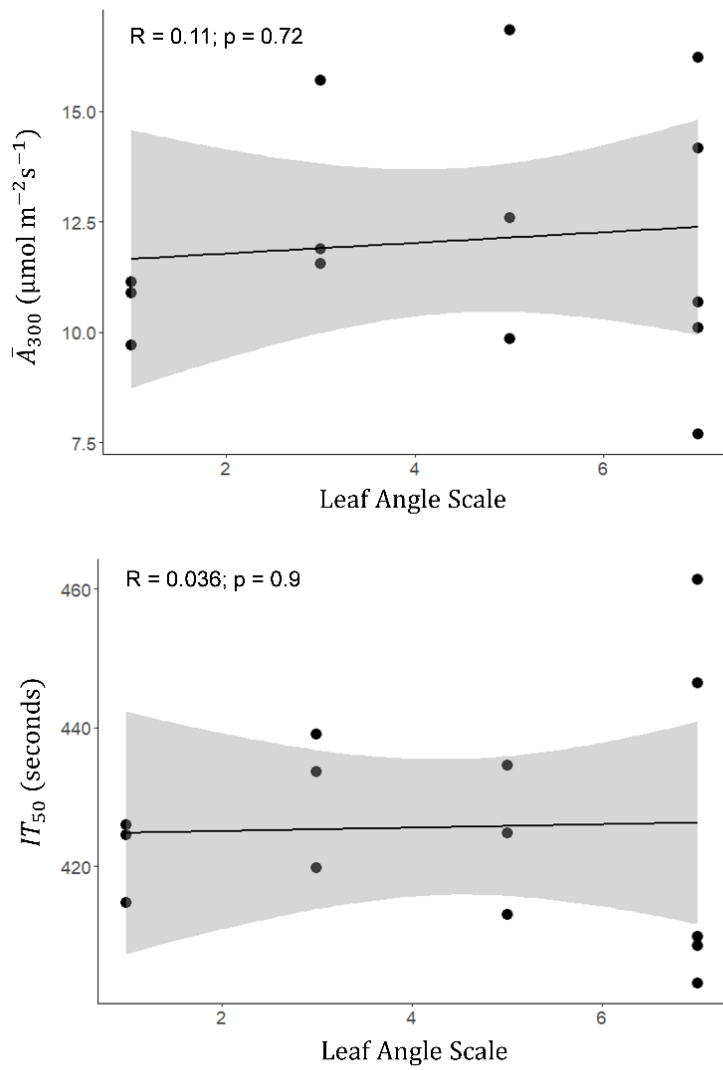

15

16 **Fig. S2** The correlation between  $\bar{A}_{300}$  and Leaf Angle,  $IT_{50}$  and Leaf Angle. Rice (*Oryza sativa*) leaf  
 17 angle can be rated on a scale from 1-9, where 1 is most erect and 9 is most drooping (IRRI Standard  
 18 Evaluation System (SES) for Rice, 2002). Correlation coefficient (R), p-value, regression line, and 95%  
 19 confidence intervals are shown for each comparison.

20

21

22

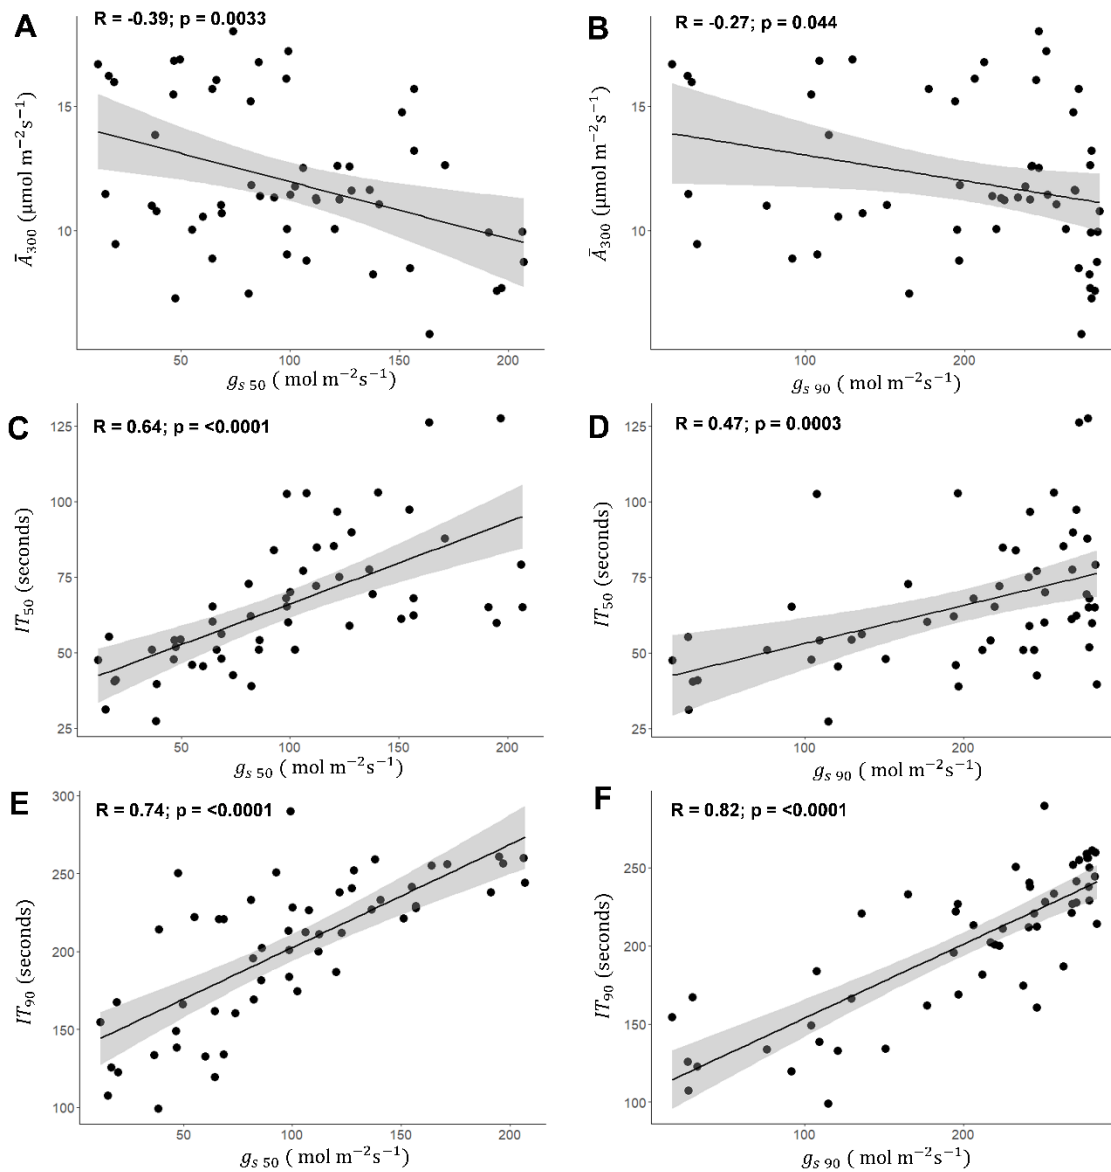

23

24 **Fig. S3** Correlation between **A.** time to 50% stomatal opening ( $g_{s\ 50}$ ) and average  $\text{CO}_2$  uptake during  
 25 induction period ( $\bar{A}_{300}$ ); **B.** time to 90% stomatal opening ( $g_{s\ 90}$ ) and  $\bar{A}_{300}$ ; **C.** time to 50% induction ( $IT_{50}$ )  
 26 and  $g_{s\ 50}$ ; **D.**  $IT_{50}$  and  $g_{s\ 90}$ ; **E.** time to 90% induction ( $IT_{90}$ ) and  $g_{s\ 50}$ ; **F.**  $IT_{90}$  and  $g_{s\ 90}$ , measured in rice  
 27 (*Oryza sativa*). Correlation coefficient (R), p-value, regression line, and 95% confidence intervals are  
 28 shown for each comparison.

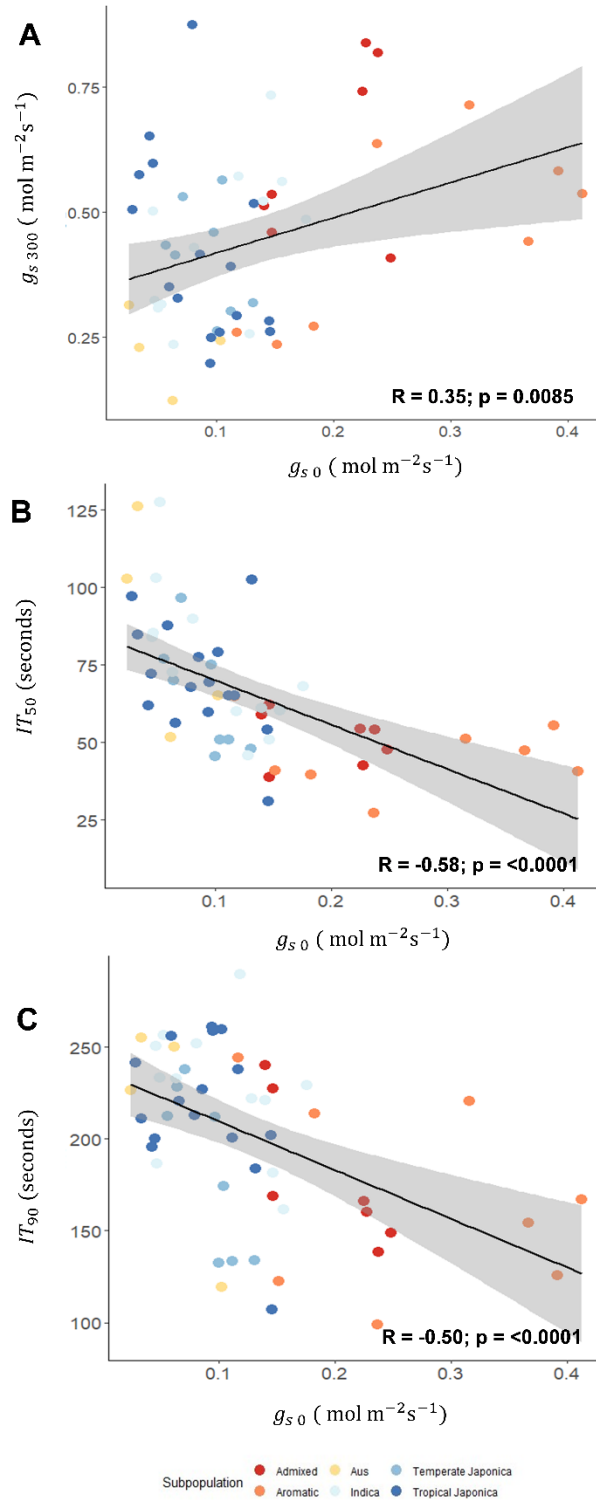

29

30 **Fig. S4** Correlation between **A.**  $g_s$  right before transition from low light to high light (50 to 1700  $\mu\text{mol m}^{-2}$   
 31  $\text{s}^{-1}$  PPFD) ( $g_{s\ 0}$ ) and at 300 s after induction ( $g_{s\ 300}$ ); **B.**  $g_{s\ 0}$  and  $IT_{50}$ ; **C.**  $g_{s\ 0}$  and  $IT_{90}$ , measured in rice  
 32 (*Oryza sativa*). Correlation coefficient (R), p-value, regression line, and 95% confidence intervals are  
 33 shown. Plants are color-coded by subpopulation.

34 **Table S1** *O. sativa* accessions selected from the 3000 Rice Genome Project (3K RGP) used to  
 35 characterize natural genetic variation for photosynthetic induction in rice. The IRGC number,  
 36 subpopulation, and country of origin are indicated.

| <b>Accession #</b> | <b>Accession Name</b> | <b>IRGC Number</b> | <b>Subpopulation</b> | <b>Geographic Region</b> |
|--------------------|-----------------------|--------------------|----------------------|--------------------------|
| <b>1</b>           | ARC 11768             | IRGC 131966        | Tropical Japonica    | India                    |
| <b>2</b>           | ARC 13502             | IRGC 127948        | Aromatic             | India                    |
| <b>3</b>           | ARC 14663             | IRGC 127959        | Admixed              | India                    |
| <b>4</b>           | AUS 278               | IRGC 127182        | Aus                  | Bangladesh               |
| <b>5</b>           | Dechangbyeo           | IRGC 128275        | Temperate Japonica   | South Korea              |
| <b>6</b>           | Du Gen Chuan          | IRGC 127345        | Indica               | China                    |
| <b>7</b>           | Fei Zhao 12           | IRGC 128291        | Temperate Japonica   | China                    |
| <b>8</b>           | JC1                   | IRGC 117494        | Aromatic             | India                    |
| <b>9</b>           | K2 C45                | IRGC 131995        | Tropical Japonica    | Cote d'Ivoire            |
| <b>10</b>          | Malagkit              | IRGC 127594        | Tropical Japonica    | Philippines              |
| <b>11</b>          | NCS 771A              | IRGC 127665        | Indica               | India                    |
| <b>12</b>          | M 102                 | IRGC 125620        | Tropical Japonica    | United States            |
| <b>13</b>          | Malogbana             | IRGC 128379        | Admixed              | Cote d'Ivoire            |
| <b>14</b>          | IR64-21               | IRGC 135929        | Indica               | Philippines              |

37  
 38  
 39  
 40  
 41  
 42  
 43  
 44  
 45  
 46  
 47  
 48  
 49  
 50  
 51  
 52  
 53

54 **Table S2** SNP sequences for Rubisco activase (Rca) gene in rice (*Oryza sativa*). Sequences for Rca were  
 55 acquired through the International Rice Informatics Consortium (IRIC) Rice SNP-seek Database  
 56 (<http://snp-seek.irri.org/snp.zul>) managed by the International Rice Research Institute (IRRI).

|              |                |             | SNP Position |          |          |          |          |          |
|--------------|----------------|-------------|--------------|----------|----------|----------|----------|----------|
| Accession    | Assay ID       | IRGC #      | 28934599     | 28934614 | 28935449 | 28935808 | 28936124 | 28936221 |
| JC 1         | IRIS 313-8326  | IRGC 117494 | C            | T        | T        | C        | C        | G        |
| NCS 771A     | IRIS 313-11646 | IRGC 127665 | C            | T        | T        | C        | C        | G        |
| IR64         | CX230          | IRGC 135929 | C            | T        | T        | C        | C        | G        |
| ARC 11768    | IRIS 313-10870 | IRGC 131966 | C            | T        | T        | C        | G        | G        |
| ARC 13502    | IRIS 313-11258 | IRGC 127948 | C            | T        | T        | C        | G        | G        |
| Dechangbyeo  | IRIS 313-11689 | IRGC 128275 | C            | T        | T        | C        | G        | G        |
| Fei Zhao 12  | IRIS 313-11651 | IRGC 128291 | C            | T        | T        | C        | G        | G        |
| K 2 C 45     | IRIS 313-11759 | IRGC 131995 | C            | T        | T        | C        | G        | G        |
| Malagkit     | IRIS 313-12272 | IRGC 127594 | C            | T        | T        | C        | G        | G        |
| M 102        | IRIS 313-8502  | IRGC 125620 | C            | T        | T        | C        | G        | G        |
| AUS 278      | IRIS 313-11052 | IRGC 127182 | C/T          | T        | T        | C        | C        | G        |
| ARC 14663    | IRIS 313-11270 | IRGC 127959 | T            | T        | T        | C        | C        | G        |
| Du Gen Chuan | IRIS 313-11796 | IRGC 127345 | T            | T        | T        | C        | C        | G        |
| Malogbana    | IRIS 313-10729 | IRGC 128379 | T            | T        | T        | C        | C        | G        |

57
